# Supplementary material for: Population structure of the ash dieback pathogen, Hymenoscyphus fraxineus, in relation to its mode of arrival in the UK
Source: PubMed Central journal article supplement (PMC5832303; doi:10.1111/ppa.12762), 2017-09-26
Supplement: PPA-67-255-s001.pdf [file PPA-67-255-s001.pdf]

**EPW**

|     |                        |
|-----|------------------------|
| 060 | CC                     |
| 061 | C CC                   |
| 066 | G g CC                 |
| 068 | G G g CC               |
| 070 | G G G G CC             |
| 071 | G G G G G CC           |
| 072 | G C G G g G CC         |
| 073 | G G g G g G G CC       |
| 076 | g C G g g - C g CC     |
| 077 | G G G G G G g G CC     |
| 079 | g G G G G - G G G CC   |
| 082 | G g G G G G G C G G CC |
| 085 | G G G G G G G G G CC   |

ASA 060 061 066 068 070 071 072 073 076 077 079 082 085

**ALMA**

|     |                      |
|-----|----------------------|
| 060 | CC                   |
| 061 | C CC                 |
| 066 | G g CC               |
| 068 | G G G CC             |
| 070 | G G G G CC           |
| 071 | G G G G G CC         |
| 072 | g C G G G - CC       |
| 073 | G g g G G G G CC     |
| 076 | g C g g g - C g CC   |
| 077 | g G G G G G g G CC   |
| 079 | g g G G g - G G G CC |
| 082 | G G G G G G G g G CC |
| 085 | G G G G G G G G G CC |

ALMA 060 061 066 068 070 071 072 073 076 077 079 082 085

**ISC**

|     |                        |
|-----|------------------------|
| 003 | Cc                     |
| 005 | G CC                   |
| 006 | C g Cc                 |
| 009 | g G g Cc               |
| 010 | g G G G CC             |
| 012 | g g - G G Cc           |
| 013 | g - g g G g CC         |
| 014 | G G G G G G G CC       |
| 015 | G G G G G G g - CC     |
| 016 | G g G g g G G C CC     |
| 019 | C g g g - C g G G CC   |
| 020 | g g g g G g G G G - C- |
| 021 | g G g g C g G G G g C- |

ASA 003 005 006 009 010 012 013 014 015 016 019 020 021

**ALMA**

|     |                          |
|-----|--------------------------|
| 003 | Cc                       |
| 005 | G CC                     |
| 006 | C g Cc                   |
| 009 | g G g Cc                 |
| 010 | g G G G CC               |
| 012 | G g g G G Cc             |
| 013 | g - g G G g CC           |
| 014 | G G G G G G G CC         |
| 015 | g G g G G G g - CC       |
| 016 | G g G g g G G C CC       |
| 019 | C g g g - G g G G CC     |
| 020 | - g - - g g G G G G - C- |
| 021 | g G g g C g G G G g - C- |

ALMA 003 005 006 009 010 012 013 014 015 016 019 020 021

**LWD**

|     |                  |
|-----|------------------|
| 044 | CC               |
| 045 | G CC             |
| 049 | G G CC           |
| 053 | G G G CC         |
| 054 | G G G G CC       |
| 065 | G G G G G CC     |
| 066 | G G G C G G CC   |
| 067 | G G g G G G G CC |
| 069 | G G G G G G G CC |
| 070 | G G G G G G G CC |

ASA 044 045 049 053 054 065 066 067 069 070

**ALMA**

|     |                    |
|-----|--------------------|
| 044 | CC                 |
| 045 | G CC               |
| 049 | G G CC             |
| 053 | G G G CC           |
| 054 | G G G G CC         |
| 065 | G G G G G CC       |
| 066 | G G G C G - CC     |
| 067 | G G g G G - G CC   |
| 069 | G G G G G g G G CC |
| 070 | G G G G g G g G CC |

ALMA 044 045 049 053 054 065 066 067 069 070

**PTW**

|      |                  |
|------|------------------|
| 031  | CC               |
| 032  | C CC             |
| 035a | G G CC           |
| 036b | g G G CC         |
| 037b | G G G G CC       |
| 039  | C G C G g CC     |
| 041d | g G g g g C CC   |
| 048  | G G G g g g G CC |
| 049c | g C C G g g G Cc |
| 053  | g - C G G G C CC |

ASA 031 032 035a 036b 037b 039 041d 048 049c 053

**ALMA**

|      |                    |
|------|--------------------|
| 031  | CC                 |
| 032  | C CC               |
| 035a | G G CC             |
| 036b | g G G CC           |
| 037b | G G G G CC         |
| 039  | C G C G g CC       |
| 041d | G G G G G G CC     |
| 048  | C G G G g G G CC   |
| 049c | g C C G G g G G CC |
| 053  | G g C G G g G C CC |

ALMA 031 032 035a 036b 037b 039 041d 048 049c 053

**PND**

|     |                    |
|-----|--------------------|
| 002 | CC                 |
| 003 | G CC               |
| 006 | G g CC             |
| 007 | G G G Cc           |
| 009 | G G G G CC         |
| 010 | G G g G G G CC     |
| 011 | g G g G G G G CC   |
| 015 | G G G G G G G CC   |
| 016 | G G g g G G g G CC |
| 026 | G G G g g g G G CC |

ASA 002 003 006 007 009 010 011 015 016 026

**ALMA**

|     |                      |
|-----|----------------------|
| 002 | CC                   |
| 003 | G CC                 |
| 006 | g g CC               |
| 007 | g G G Cc             |
| 009 | g G G G CC           |
| 010 | G G g G G G CC       |
| 011 | g G g G G G G CC     |
| 015 | G G g G G g g CC     |
| 016 | g G g g C G G g G CC |
| 026 | G G G G g g G G CC   |

ALMA 002 003 006 007 009 010 011 015 016 026

**BWY**

|      |                  |
|------|------------------|
| 02L2 | CC               |
| 02L3 | g CC             |
| 02L4 | G G CC           |
| 003  | g G G CC         |
| 007  | g g g G CC       |
| 010  | G G G g g CC     |
| 011  | G G G G g g CC   |
| 039  | G g G C G G G CC |

ASA 02L2 02L3 02L4 003 007 010 011 039

**ALMA**

|      |                  |
|------|------------------|
| 02L2 | CC               |
| 02L3 | g CC             |
| 02L4 | G G CC           |
| 003  | g G G CC         |
| 007  | g g g G CC       |
| 010  | G G G g C CC     |
| 011  | G G G G g g CC   |
| 039  | G g G C G G G CC |

ALMA 02L2 02L3 02L4 003 007 010 011 039

Supplementary Figure 1. Reaction patterns of *Hymenoscyphus fraxineus* isolate pairings on ash sapwood agar (ASA) and ash leaf agar (ALMA) from six UK populations. C= Compatible, c= known compatible with unstructured, diffuse gaps, G= strong structured gap reaction, g= weaker structured gap reaction, - unreadable or failed reaction with no score.
