# Supplementary material for: Population structure of the ash dieback pathogen, Hymenoscyphus fraxineus, in relation to its mode of arrival in the UK
Source: PubMed Central journal article supplement (PMC5832303; doi:10.1111/ppa.12762), 2017-09-26
Supplement: PPA-67-255-s004.pdf [file PPA-67-255-s004.pdf]

Population structure of the ash dieback pathogen, *Hymenoscyphus fraxineus*, in relation to its mode of arrival in the UK. Orton *et al.* 2017 Plant Pathology

Supplementary Table 1. Location and description of sampling sites for *Hymenoscyphus fraxineus* in England and Wales.

| Location code                                 | Location                    | Site description                                                                                               | Sample type                                                                                           | Sampling date               | Sampled / isolated by | Number of isolates | Isolate codes                |
|-----------------------------------------------|-----------------------------|----------------------------------------------------------------------------------------------------------------|-------------------------------------------------------------------------------------------------------|-----------------------------|-----------------------|--------------------|------------------------------|
| <b>Isolated planting-associated outbreaks</b> |                             |                                                                                                                |                                                                                                       |                             |                       |                    |                              |
| BWY<br><i>Planted</i>                         | Tiverton<br>Devon           | Planted in 1996 with some replacement blocks of mixed broadleaf tree species.                                  | Branches and shoots 2-4 cm diameter on ash 10-15 cm diameter at breast height (dbh).                  | November 2013<br>April 2014 | CB , KK<br>CB, KK     | 3<br>40            | BWY 002 L1-L3<br>BWY 003-042 |
| ISC<br><i>Planted</i>                         | Whitland<br>Carmarthenshire | Planted in 2006 on grazing site. Close to older ash planted in 1990s, also becoming symptomatic in the canopy. | Ash shoots/branches, mostly 1-2 cm dbh.                                                               | March 2014                  | OT, KK                | 24                 | ISC 001-024                  |
| PTW<br><i>Planted</i>                         | Swadlingcote<br>Derbyshire  | Two 2008 planting blocks on ex mine site with trees planted in 1997 also present.                              | Ash stems and branches, 1.5-3 cm dbh.                                                                 | December 2013<br>April 2014 | BJ , KK<br>CB , KK    | 10<br>21           | PTW 001-010<br>PTW 0030-050  |
| <b>East coast 'widespread infection' zone</b> |                             |                                                                                                                |                                                                                                       |                             |                       |                    |                              |
| EPW<br><i>Established</i>                     | Canterbury<br>Kent          | Mature mixed broadleaf and conifer plantation with natural ash stands and patches of ash regeneration.         | Stems and branches on regeneration saplings mostly 1-5 cm dbh close to infected stands of mature ash. | March 2014                  | EO, CB                | 26                 | EPW 060-085                  |
| LWD<br><i>Established</i>                     | Wymondham<br>Norfolk        | Ancient ash and hazel woodland, with ash coppice and mature standards.                                         | Coppice ash stems 2-5 cm dbh.                                                                         | March 2014                  | EO ,JB                | 33                 | LWD 042-070                  |
| PND<br><i>Mixed</i>                           | Saxmundham<br>Suffolk       | Mixed broadleaf woodland with some planted areas ca 1993-2002.                                                 | Stems and branches from natural regeneration saplings, mostly 1-5 cm dbh.                             | March 2014                  | EO, JB, CB            | 26                 | PND 001-026                  |

BJ, Ben Jones (Forestry Commission); CB, Clive Brasier; EO, Elizabeth Orton; JB, James Brown; KK, Kevin King (Forest Research); OT, Owen Thurgate (FC)
