# Supplementary material for: Population structure of the ash dieback pathogen, Hymenoscyphus fraxineus, in relation to its mode of arrival in the UK
Source: PubMed Central journal article supplement (PMC5832303; doi:10.1111/ppa.12762), 2017-09-26
Supplement: PPA-67-255-s005.pdf [file PPA-67-255-s005.pdf]

| Marker location                                           | SNP   | Allele 1 primer(A)       | Allele 2 primer (B)      | Common primer        | Orientation | Product size |
|-----------------------------------------------------------|-------|--------------------------|--------------------------|----------------------|-------------|--------------|
| <sup>1</sup> Cf746836_TGAC_s1v1_scaffold_10:11517-11517   | C183T | tcgaagagcaataaatctttgtgC | tcgaagagcaataaatctttgtgT | tgctgagggtatgcaatca  | forward     | 75           |
| <sup>1</sup> Cf746836_TGAC_s1v1_scaffold_1002:17412-17412 | G160A | atcgattcgtcttgccgC       | atcgattcgtcttgccgA       | gagcggaaacagctctacga | forward     | 87           |
| <sup>1</sup> Cf746836_TGAC_s1v1_scaffold_1129:18698-18698 | G97A  | ttaccacgatcgcttgatcG     | ttaccacgatcgcttgatcA     | accaaaccaaccagggtgaa | forward     | 67           |
| <sup>1</sup> Cf746836_TGAC_s1v1_scaffold_1163:15555-15555 | A183G | cgtattagccttgattggtagtG  | cgtattagccttgattggtagtG  | agacgttgcgagatatac   | forward     | 55           |
| <sup>1</sup> Cf746836_TGAC_s1v1_scaffold_1206:21784-21784 | C61T  | gacacttcaattgcagggcC     | gacacttcaattgcagggcT     | tgctacacaccagatgcacg | forward     | 50           |
| <sup>1</sup> Cf746836_TGAC_s1v1_scaffold_1207:16186-16186 | C106A | cgaagcctggagattcgcC      | cgaagcctggagattcgcA      | cccactgtagccgttcaact | forward     | 62           |
| <sup>1</sup> Cf746836_TGAC_s1v1_scaffold_1208:18637-18637 | A127G | acctatctttgccatcgttggA   | acctatctttgccatcgttggG   | cgcgatcattggggttagt  | forward     | 93           |
| <sup>1</sup> Cf746836_TGAC_s1v1_scaffold_1214:14499-14499 | C257T | agacgtttatcgaagcatctacC  | agacgtttatcgaagcatctacT  | acccttcgttctgatgacg  | forward     | 50           |
| <sup>1</sup> Cf746836_TGAC_s1v1_scaffold_1222:16284-16284 | G242C | ctcctacgcaaatatcacggaaaG | ctcctacgcaaatatcacggaaaC | tttctctacgggctcctcca | forward     | 50           |
| <sup>1</sup> Cf746836_TGAC_s1v1_scaffold_1224:31390-31390 | C96A  | ccaatgctgtcgacaatggaaC   | ccaatgctgtcgacaatggaaA   | ggaggtgatactgcattcgt | forward     | 56           |
| <sup>1</sup> Cf746836_TGAC_s1v1_scaffold_1314:26104-26104 | A75G  | ccatatagacgacaaattcagccT | ccatatagacgacaaattcagccC | atgcgcacctgtaccacaaa | reverse     | 58           |
| <sup>1</sup> Cf746836_TGAC_s1v1_scaffold_1654:48638-48638 | C197A | ccgagtgggaatgaatcagataaC | ccgagtgggaatgaatcagataaA | gtctcaagtcagcgccctaa | forward     | 56           |
| <sup>1</sup> Cf746836_TGAC_s1v1_scaffold_190:7813-7813    | A181G | gccgaaagtgttgatctacaaaA  | gccgaaagtgttgatctacaaaG  | gcgaggcattgactgtagc  | forward     | 55           |
| <sup>1</sup> Cf746836_TGAC_s1v1_scaffold_230:7222-7222    | T256C | tcgaaacggaactccaataT     | tcgaaacggaactccaataC     | tcaacattacccccggcttc | forward     | 50           |
| <sup>1</sup> Cf746836_TGAC_s1v1_scaffold_260:3927-3927    | A174G | gtggcagtctatctcacagA     | gtggcagtctatctcacagG     | tccccgctctaccgaataga | forward     | 87           |
| <sup>1</sup> Cf746836_TGAC_s1v1_scaffold_266:4074-4074    | C173T | tcaaacgacttacaagcaacagC  | tcaaacgacttacaagcaacagT  | gggcctcgatacaaccacaa | forward     | 52           |
| <sup>1</sup> Cf746836_TGAC_s1v1_scaffold_370:2537-2537    | C131T | gcctgcttctccccttagC      | gcctgcttctccccttagT      | ggctaactcgtctcctgcta | forward     | 57           |
| <sup>1</sup> Cf746836_TGAC_s1v1_scaffold_435:4691-4691    | G131A | gaggagacgagcgagccG       | gaggagacgagcgagccA       | ccacctccaaagtactccc  | forward     | 61           |
| <sup>1</sup> Cf746836_TGAC_s1v1_scaffold_503:8173-8173    | T131C | tctcaatccattggcttggT     | tctcaatccattggcttggC     | attgcctcaaacgactgctg | forward     | 69           |
| <sup>1</sup> Cf746836_TGAC_s1v1_scaffold_570:12487-12487  | C131T | cagaaggctacaacgtggaC     | cagaaggctacaacgtggaT     | gcgttcatatcgccgcttg  | forward     | 77           |
| <sup>1</sup> Cf746836_TGAC_s1v1_scaffold_641:18581-18581  | T113C | acgtctgtaaattgcatcgaaT   | acgtctgtaaattgcatcgaaC   | ggagggaggcaatattccg  | forward     | 54           |
| <sup>1</sup> Cf746836_TGAC_s1v1_scaffold_721:14083-14083  | T216C | ccgaagttacactgcccatatT   | ccgaagttacactgcccatatC   | tgggaaaggcttgaaggag  | forward     | 54           |
| <sup>1</sup> Cf746836_TGAC_s1v1_scaffold_910:18473-18473  | C145T | ccctttggctcactggatcC     | ccctttggctcactggatcT     | tacttctgactccgagct   | forward     | 50           |
| <sup>1</sup> Cf746836_TGAC_s1v1_scaffold_926:10136-10136  | C183A | tcgaggcagaaggatattacgaC  | tcgaggcagaaggatattacgaA  | gccttcatgcgaatcggc   | forward     | 73           |
| <sup>1</sup> Cf746836_TGAC_s1v1_scaffold_943:42592-42592  | T131C | ttttgttctttggtgccactaT   | ttttgttctttggtgccactaC   | ggcgtcccctttgtatagca | forward     | 59           |
| <sup>1</sup> Cf746836_TGAC_s1v1_scaffold_945:18575-18575  | C183A | agcatcgactcacagaattaaC   | agcatcgactcacagaattaaA   | atatgttcccgatcggcctg | forward     | 55           |
| <sup>1</sup> Cf746836_TGAC_s1v1_scaffold_954:35750-35750  | G184A | tcggccttagcacttccaG      | tcggccttagcacttccaA      | ttacaatcccggcgactg   | forward     | 102          |
| <sup>1</sup> Cf746836_TGAC_s1v1_scaffold_960:13477-13477  | T132C | agcaacttcggaagagtggT     | agcaacttcggaagagtggC     | taagccaccgatcgtgag   | forward     | 50           |
| Cf746836_TGAC_s1v1_scaffold_10:3268-3268                  | A92G  | gggacacaaccacaggagaA     | gggacacaaccacaggagaG     | atccggccatacaacagcat | forward     | 50           |
| Cf746836_TGAC_s1v1_scaffold_1000:32711-32711              | C131T | gttctcaaattggataggagatG  | gttctcaaattggataggagatA  | actcttctcgacaccgt    | reverse     | 94           |
| Cf746836_TGAC_s1v1_scaffold_1005:8542-8542                | A167T | ggatgctttgatattgtatcgaT  | ggatgctttgatattgtatcgaA  | cccgaatcacctcacaaca  | reverse     | 69           |

| Marker location                              | SNP   | Allele 1 primer(A)        | Allele 2 primer (B)       | Common primer           | Orientation | Product size |
|----------------------------------------------|-------|---------------------------|---------------------------|-------------------------|-------------|--------------|
| Cf746836_TGAC_s1v1_scaffold_1005:9139-9139   | T95G  | tcgaaacatatgaagcgactC     | tcgaaacatatgaagcgactC     | tcgcaccaggcgaattg       | forward     | 73           |
| Cf746836_TGAC_s1v1_scaffold_1011:10313-10313 | G184A | tttctgaggctttccaactttC    | tttctgaggctttccaactttT    | attctccttgcccaatccg     | reverse     | 52           |
| Cf746836_TGAC_s1v1_scaffold_1015:13833-13833 | G162A | tttctgaggctttccaactttC    | tttctgaggctttccaactttT    | attctccttgcccaatccg     | reverse     | 52           |
| Cf746836_TGAC_s1v1_scaffold_107:6372-6372    | A226C | agacggcgatgggagatcA       | agacggcgatgggagatcC       | tccagcaaccagtctgtctc    | forward     | 110          |
| Cf746836_TGAC_s1v1_scaffold_1119:10948-10948 | T131A | acgacgggccatatcttgaT      | acgacgggccatatcttgaA      | tgactaccttctgctcccca    | forward     | 83           |
| Cf746836_TGAC_s1v1_scaffold_1127:10226-10226 | C149T | ggagagagtaaggggttgaC      | ggagagagtaaggggttgaT      | gtcgtcgtcaagctcctcat    | forward     | 70           |
| Cf746836_TGAC_s1v1_scaffold_1135:21042-21042 | G177A | cttccaagttcgagtagcaacG    | cttccaagttcgagtagcaacA    | tgtggacttcttgaatgacc    | forward     | 50           |
| Cf746836_TGAC_s1v1_scaffold_1153:17716-17716 | C184T | tgataagtagcggatgagaaaagG  | tgataagtagcggatgagaaaagA  | gaccctactccaatcccgtt    | reverse     | 81           |
| Cf746836_TGAC_s1v1_scaffold_1154:19073-19073 | A81T  | ccgtccatgcgtccatttT       | ccgtccatgcgtccatttA       | ggacacagagcccttgtcat    | reverse     | 75           |
| Cf746836_TGAC_s1v1_scaffold_1165:20102-20102 | G190A | agtaacaagtgcacgcgaatG     | agtaacaagtgcacgcgaatA     | tggccgatacagaacaacga    | forward     | 68           |
| Cf746836_TGAC_s1v1_scaffold_1173:10486-10486 | C90A  | ggagtttgatgactttactctcgtG | ggagtttgatgactttactctcgtT | tccgtcaccaagattgtcca    | reverse     | 106          |
| Cf746836_TGAC_s1v1_scaffold_1176:13698-13698 | A133G | attccccaccaagtctcgaT      | attccccaccaagtctcgaC      | tggatacatgcaactggcgt    | reverse     | 58           |
| Cf746836_TGAC_s1v1_scaffold_1177:36419-36419 | T255C | catccgaccgcttgacagaT      | catccgaccgcttgacagaC      | ttgaaacggacgactcctg     | forward     | 50           |
| Cf746836_TGAC_s1v1_scaffold_1178:12140-12140 | G185A | gttgccattgttctacataggtcC  | gttgccattgttctacataggtC   | taggagatcgaccctggctc    | reverse     | 73           |
| Cf746836_TGAC_s1v1_scaffold_1188:15873-15873 | G185A | cggtgtgcatgatcttcagaaG    | cggtgtgcatgatcttcagaaA    | tcttgcgaggagtttct       | forward     | 50           |
| Cf746836_TGAC_s1v1_scaffold_1191:8950-8950   | T82C  | ccccaaactgtctccatccT      | ccccaaactgtctccatccC      | cctcagtgcatcgaccttt     | forward     | 50           |
| Cf746836_TGAC_s1v1_scaffold_1192:52144-52144 | C182T | cccacagttcagtcacgcG       | cccacagttcagtcacgcA       | tcacgcggggagacaattaa    | reverse     | 69           |
| Cf746836_TGAC_s1v1_scaffold_1194:14893-14893 | G255A | tctcgtggattatgggaagataG   | tctcgtggattatgggaagataA   | cgtgtttccaggtgaggtca    | forward     | 53           |
| Cf746836_TGAC_s1v1_scaffold_1195:40301-40301 | C180T | tcaactacctttagacgtgatC    | tcaactacctttagacgtgatT    | atcctgccgaagaactt       | forward     | 87           |
| Cf746836_TGAC_s1v1_scaffold_1197:11925-11925 | T183C | acctaacatacagttgaggagcaT  | acctaacatacagttgaggagcaC  | tgaggagaacgttcgcacat    | forward     | 53           |
| Cf746836_TGAC_s1v1_scaffold_1200:67205-67205 | T188C | tgaatccagctatcgacctcA     | tgaatccagctatcgacctcG     | gctgagaagtgggaaggacc    | reverse     | 50           |
| Cf746836_TGAC_s1v1_scaffold_1202:34718-34718 | A148T | cctcgatgcctagtcttttagctA  | cctcgatgcctagtcttttagctT  | ttcgtccccgattctctct     | forward     | 54           |
| Cf746836_TGAC_s1v1_scaffold_1203:31603-31603 | A211G | tgattctcgagtcttttgatggA   | tgattctcgagtcttttgatggG   | ccatggaatttggagtctatgc  | forward     | 72           |
| Cf746836_TGAC_s1v1_scaffold_1228:9887-9887   | C78T  | atagctttatcttaccgcctaaaaG | atagctttatcttaccgcctaaaaA | agtctagagcttagtagggtgaa | reverse     | 61           |
| Cf746836_TGAC_s1v1_scaffold_1234:36065-36065 | T129G | aatctgtctcccaacggtcT      | aatctgtctcccaacggtcG      | cgacgtgggatgaaaatgc     | forward     | 52           |
| Cf746836_TGAC_s1v1_scaffold_1235:24111-24111 | G106A | ccaactccattcgcttctcaC     | ccaactccattcgcttctcaT     | cggagtggtttgggttg       | reverse     | 61           |
| Cf746836_TGAC_s1v1_scaffold_1237:18853-18853 | T257C | cgatattctcggtatccccagT    | cgatattctcggtatccccagC    | aaaggagaaaggaggcagg     | forward     | 50           |
| Cf746836_TGAC_s1v1_scaffold_1238:11063-11063 | C158T | tcacgtgtcttgctatgaactC    | tcacgtgtcttgctatgaactT    | cttctttcgaccgttctgt     | forward     | 57           |
| Cf746836_TGAC_s1v1_scaffold_1240:16580-16580 | G209A | tcaacatgaatctagtgtctagcC  | tcaacatgaatctagtgtctagcT  | gaaggtaccaagctgagagc    | reverse     | 79           |
| Cf746836_TGAC_s1v1_scaffold_1249:12785-12785 | G133C | acctatccccatcattcctttctC  | acctatccccatcattcctttctG  | atcgagggtgaaggtgagga    | reverse     | 50           |
| Cf746836_TGAC_s1v1_scaffold_1259:17360-17360 | A112G | tggataaacaaccttggccA      | tggataaacaaccttggccG      | acctgcttggatgttctatgtt  | forward     | 55           |
| Cf746836_TGAC_s1v1_scaffold_130:5372-5372    | G178A | ttggaggacgagtcagtaC       | ttggaggacgagtcagtaT       | cctctctcctcatcctgca     | reverse     | 118          |
| Cf746836_TGAC_s1v1_scaffold_136:10532-10532  | C183G | ccacttcccgtgcatcgtC       | ccacttcccgtgcatcgtG       | ttttcagggttaccgagg      | forward     | 88           |
| Cf746836_TGAC_s1v1_scaffold_1475:21355-21355 | G77C  | acacataaccgacctcaC        | acacataaccgacctcaG        | gctggggtttgtttgtca      | reverse     | 61           |
| Cf746836_TGAC_s1v1_scaffold_1489:19529-19529 | G278A | tgtttcccgcctactatcagaG    | tgtttcccgcctactatcagaA    | tcgctagagagccttact      | forward     | 57           |

| Marker location                             | SNP   | Allele 1 primer(A)        | Allele 2 primer (B)       | Common primer            | Orientation | Product size |
|---------------------------------------------|-------|---------------------------|---------------------------|--------------------------|-------------|--------------|
| Cf746836_TGAC_s1v1_scaffold_160:1888-1888   | A163G | cgtagacagtttgaatctcacgA   | cgtagacagtttgaatctcacgG   | gatgttgctgcgctagagga     | forward     | 66           |
| Cf746836_TGAC_s1v1_scaffold_19:9684-9684    | C121T | actcattccatcttctatgtcttcC | actcattccatcttctatgtcttcT | cttcttgatcgagtgcgct      | forward     | 50           |
| Cf746836_TGAC_s1v1_scaffold_20:26048-26048  | T213C | ctccaaagtcttgacagcaaataT  | ctccaaagtcttgacagcaaataC  | tcgactgacttgccctgtc      | forward     | 53           |
| Cf746836_TGAC_s1v1_scaffold_250:5824-5824   | A211T | tggactattcgggatatgcaaagA  | tggactattcgggatatgcaaagT  | ccctcatcccaaatccaca      | forward     | 95           |
| Cf746836_TGAC_s1v1_scaffold_290:1783-1783   | C132T | gcgtatatgtcggctggtC       | gcgtatatgtcggctggtT       | ggcctctctcttttcgca       | forward     | 64           |
| Cf746836_TGAC_s1v1_scaffold_31:14199-14199  | C183A | gctcaacggctttccaccC       | gctcaacggctttccaccA       | agcaacctgcctactttggt     | forward     | 68           |
| Cf746836_TGAC_s1v1_scaffold_320:8266-8266   | C131T | aactccacgatataattgccatcC  | aactccacgatataattgccatcT  | cctcgcgtcacaacctaac      | forward     | 108          |
| Cf746836_TGAC_s1v1_scaffold_360:3688-3688   | G202A | gggaccgcggtttgtcttC       | gggaccgcggtttgtcttT       | gagcttcacgttgatgggc      | reverse     | 65           |
| Cf746836_TGAC_s1v1_scaffold_373:5593-5593   | C142T | aagattggccaccagcgaG       | aagattggccaccagcgaA       | ccgaggatgccaagtctcta     | reverse     | 65           |
| Cf746836_TGAC_s1v1_scaffold_38:12528-12528  | A184C | ccaaaaacactggtacgtcgA     | ccaaaaacactggtacgtcgC     | cgagctatgcgtccaaacca     | forward     | 104          |
| Cf746836_TGAC_s1v1_scaffold_390:3663-3663   | A75G  | ggagagccgagtagaggtG       | ggagagccgagtagaggtG       | gacggaattcaggagggaca     | reverse     | 64           |
| Cf746836_TGAC_s1v1_scaffold_395:16425-16425 | T257A | agctttgctgagaacgcctA      | agctttgctgagaacgcctT      | agacttcatggaagctcca      | reverse     | 52           |
| Cf746836_TGAC_s1v1_scaffold_405:12701-12701 | C251T | actgccttgaacaagtcagaataG  | actgccttgaacaagtcagaataA  | aatgttgagagccttcagg      | reverse     | 52           |
| Cf746836_TGAC_s1v1_scaffold_411:12709-12709 | T84G  | cggggtgtgggatcgagaA       | cggggtgtgggatcgagaC       | gccttctgtaaatccatgtggg   | reverse     | 51           |
| Cf746836_TGAC_s1v1_scaffold_430:16527-16527 | G127A | tctggatcgtagacaaatacaacG  | tctggatcgtagacaaatacaacA  | tggacgcatcgaaaagggt      | forward     | 61           |
| Cf746836_TGAC_s1v1_scaffold_440:6854-6854   | G131A | ggagccacaccattgaagcC      | ggagccacaccattgaagcT      | tggggctacatcaactcg       | reverse     | 61           |
| Cf746836_TGAC_s1v1_scaffold_461:15064-15064 | A183G | aagtgtaggaattaaagatgcatcT | aagtgtaggaattaaagatgcatcC | cagcatgtggaactgtgcat     | reverse     | 101          |
| Cf746836_TGAC_s1v1_scaffold_502:8343-8343   | G109T | gtccttttctatgttggcactactC | gtccttttctatgttggcactactA | ggatcggcaatccaggcaa      | reverse     | 58           |
| Cf746836_TGAC_s1v1_scaffold_522:8890-8890   | T107C | ctgcaccttggccaatgaT       | ctgcaccttggccaatgaC       | aatgctgccggtaccagac      | forward     | 50           |
| Cf746836_TGAC_s1v1_scaffold_537:3328-3328   | A183G | ccccatagatcaacacctgA      | ccccatagatcaacacctgG      | catctcaggagctacagtgt     | forward     | 80           |
| Cf746836_TGAC_s1v1_scaffold_545:37645-37645 | A183T | agcacggatcaaatggataaatG   | agcacggatcaaatggataaatA   | atcagggtatatagagcatttgat | reverse     | 76           |
| Cf746836_TGAC_s1v1_scaffold_591:13027-13027 | A131G | catctctacctatgtcgaacatT   | catctctacctatgtcgaacatC   | gtggcgggtcttcaatgta      | reverse     | 69           |
| Cf746836_TGAC_s1v1_scaffold_610:18880-18880 | G114A | gtctgtgaagacatttccaattC   | gtctgtgaagacatttccaattT   | aggaaagattcttgaatccccga  | reverse     | 104          |
| Cf746836_TGAC_s1v1_scaffold_630:22098-22098 | A141G | caacctgggcagtctctagT      | caacctgggcagtctctagC      | tgcggaaatagctgtgact      | reverse     | 64           |
| Cf746836_TGAC_s1v1_scaffold_692:4013-4013   | G148A | ccccaccacaccactttcG       | ccccaccacaccactttcA       | tctggttaagagctgtggag     | forward     | 50           |
| Cf746836_TGAC_s1v1_scaffold_70:14807-14807  | C183T | ggcgtctccatgtagaagcG      | ggcgtctccatgtagaagcA      | gatgacctcgtgtccctac      | reverse     | 52           |
| Cf746836_TGAC_s1v1_scaffold_701:12513-12513 | G256C | tgtgactcctagtccccgG       | tgtgactcctagtccccgC       | ctgtgagaacctgcatcggg     | forward     | 59           |
| Cf746836_TGAC_s1v1_scaffold_703:6096-6096   | C81T  | tgagtgaacgaatgattggG      | tgagtgaacgaatgattggA      | ctcccaactaacagccacc      | reverse     | 59           |
| Cf746836_TGAC_s1v1_scaffold_715:3029-3029   | C130A | acaccgacgatcaggagaatC     | acaccgacgatcaggagaatG     | acttgaagattgccacccc      | forward     | 75           |
| Cf746836_TGAC_s1v1_scaffold_719:5776-5872   | C107A | tgcaagacagtcctatggtcG     | tgcaagacagtcctatggtcT     | ttccttctggatgggtgga      | reverse     | 50           |
| Cf746836_TGAC_s1v1_scaffold_725:17813-17813 | C58T  | gaagaggttgcaagtggctG      | gaagaggttgcaagtggctA      | tgccccagtatccccagatt     | reverse     | 50           |
| Cf746836_TGAC_s1v1_scaffold_745:7897-7897   | G115A | acgtaatatcaacggcactacG    | acgtaatatcaacggcactacA    | ggctatggttggggaacag      | forward     | 72           |
| Cf746836_TGAC_s1v1_scaffold_751:17953-17953 | G109A | tcccgatttagaagagtacttgttC | tcccgatttagaagagtacttgttT | cgcggatatatccttaatagaggg | reverse     | 67           |
| Cf746836_TGAC_s1v1_scaffold_757:14001-14001 | T65C  | accttgggtgttctcatttT      | accttgggtgttctcatttC      | ccaagactgatccacctgca     | forward     | 94           |
| Cf746836_TGAC_s1v1_scaffold_763:35469-35469 | G175A | tcgccccctagcctagC         | tcgccccctagcctagT         | actttcagagctaggtagaattaa | reverse     | 52           |

| Marker location                             | SNP   | Allele 1 primer(A)        | Allele 2 primer (B)       | Common primer          | Orientation | Product size |
|---------------------------------------------|-------|---------------------------|---------------------------|------------------------|-------------|--------------|
| Cf746836_TGAC_s1v1_scaffold_767:14435-14435 | G132A | tcgctcgttcgacctgaC        | tcgctcgttcgacctgaT        | gcgacgtgtatccttgggtt   | reverse     | 53           |
| Cf746836_TGAC_s1v1_scaffold_782:14949-14949 | C87G  | gccgacactgatagcgcC        | gccgacactgatagcgcG        | ggcctttcaaattgaccaagc  | forward     | 69           |
| Cf746836_TGAC_s1v1_scaffold_790:20054-20054 | G151A | tggcgattggtactctacagaC    | tggcgattggtactctacagaT    | atgccttgactgcttccgt    | reverse     | 50           |
| Cf746836_TGAC_s1v1_scaffold_803:17894-17894 | A107C | ggtggcgaggaagagctgT       | ggtggcgaggaagagctgG       | agccaattcccaaatgcbc    | reverse     | 50           |
| Cf746836_TGAC_s1v1_scaffold_811:20379-20379 | T141C | cgttctattatgactagccgaA    | cgttctattatgactagccgaG    | ggtttgctgctgattggaag   | reverse     | 50           |
| Cf746836_TGAC_s1v1_scaffold_817:16085-16085 | T119C | tcttccattttcgacgagcataT   | tcttccattttcgacgagcataC   | gtgtggaaggaaattgccgg   | forward     | 59           |
| Cf746836_TGAC_s1v1_scaffold_821:7573-7573   | G184A | cgcacactttatcccagattatC   | cgcacactttatcccagattatT   | cgttcgatggcgggaattgt   | reverse     | 79           |
| Cf746836_TGAC_s1v1_scaffold_845:7781-7781   | G132A | attgggttgcttctcgggaC      | attgggttgcttctcgggaT      | aaccttgctgtcgattgct    | reverse     | 51           |
| Cf746836_TGAC_s1v1_scaffold_860:9331-9331   | A183G | actcgtgatgcbcaattacA      | actcgtgatgcbcaattacG      | gttcgagaccctgtgactgg   | forward     | 79           |
| Cf746836_TGAC_s1v1_scaffold_865:15100-15100 | C183T | tctcgttatacagccagcgtC     | tctcgttatacagccagcgtT     | cgagatgaagtccagaccctga | forward     | 70           |
| Cf746836_TGAC_s1v1_scaffold_880:6319-6319   | T135G | acaagtaaacagactccccatT    | acaagtaaacagactccccatG    | attcacgtgtgtggtgcaga   | forward     | 59           |
| Cf746836_TGAC_s1v1_scaffold_890:49790-49790 | C135T | agatcaaggctgaagaggtgG     | agatcaaggctgaagaggtgA     | gtgacgaccttctctcgac    | reverse     | 79           |
| Cf746836_TGAC_s1v1_scaffold_915:18417-18417 | T183A | ttctgaagaaggtacagaaggaT   | ttctgaagaaggtacagaaggaA   | tgccctcaacatggttaaga   | forward     | 51           |
| Cf746836_TGAC_s1v1_scaffold_935:9476-9476   | G152A | tgactacgatttcccccaG       | tgactacgatttcccccaA       | tgctgtttctcactgct      | forward     | 56           |
| Cf746836_TGAC_s1v1_scaffold_967:37083-37083 | T184C | cctatttaaccgttccgttaccttA | cctatttaaccgttccgttaccttG | aatcgggctaagcgtcgg     | reverse     | 76           |
| Cf746836_TGAC_s1v1_scaffold_970:12597-12597 | G132A | taggaatgacggctgtgtcC      | taggaatgacggctgtgtcT      | tggaaactactcctcgacct   | reverse     | 78           |
| Cf746836_TGAC_s1v1_scaffold_980:47596-47596 | G184T | tgatggtgatgaatgaccaaacG   | tgatggtgatgaatgaccaaacT   | caccgagaatctcagcgact   | forward     | 57           |
| Cf746836_TGAC_s1v1_scaffold_986:25597-25597 | T116C | acacattcgtctcagcagT       | acacattcgtctcagcagC       | tagagtccccgagcagat     | forward     | 80           |

<sup>1</sup> Markers used for population study.
